# Supplementary material for: Are we doing too many non-therapeutic laparotomies in trauma? An analysis of the National Trauma Data Bank
Source: Springer Nature journal article supplement (doi:10.1007/s00464-019-07169-z), 2019-10-11
Supplement: MOESM1 [file 17264652]

Supplement 1. Multivariate analysis for independent predictors of outcomes

|  | **Mortality** | | **Prolonged Stay** | | **Complications** | |
| --- | --- | --- | --- | --- | --- | --- |
| **Variable** | **OR** | **95% CI** | **OR** | **95% CI** | **OR** | **95% CI** |
| NL (vs. DL) | 4.5 | 2.1 – 9.7 | 2.7 | 2.1 – 3.7 | 2.2 | 1.4 – 3.3 |
| Age (vs.18-34) |  |  |  |  |  |  |
| 35-64 | 2 | 1.3 – 3 | 1.5 | 1.3 – 1.8 | 1.6 | 1.1 – 2.2 |
| 65+ | 7.7 | 4.4 – 13.6 | 2.4 | 1.5 – 3.9 | 2.7 | 1.6 – 4.7 |
| Race (vs. White) |  |  |  |  |  |  |
| Black | 1.3 | 0.7 – 2.1 | 1.2 | 0.9 – 1.5 | 1.1 | 0.8 – 1.7 |
| Hispanic | 0.8 | 0.4 – 1.6 | 0.9 | 0.7 – 1.2 | 0.85 | 0.54 – 1.4 |
| Other | 0.7 | 0.3 – 1.6 | 0.6 | 0.4 – 0.9 | 1.01 | 0.5 – 1.96 |
| Penetrating (vs. Blunt) | 0.24 | 0.15 – 0.4 | 0.4 | 0.3 – 0.5 | 0.4 | 0.26 – 0.55 |
| ISS | 1.1 | 1.02 – 1.15 | 1.17 | 1.14 – 1.2 | 1.14 | 1.1 – 1.2 |
| Severe Head Injury | 1.04 | 0.3 – 3.5 | 0.65 | 0.25 – 1.7 | 0.5 | 0.14 – 1.7 |
| Severe Chest Injury | 1.17 | 0.7 - 2 | 1.3 | 1.04 – 1.65 | 1.3 | 0.9 – 1.8 |
| GCS (vs. 12-15) |  |  |  |  |  |  |
| 9-11 | 4 | 1.6 – 10.5 | 2.6 | 1.3 – 5.7 | 3.8 | 1.7 – 8.2 |
| 6-8 | 5.4 | 1.5 – 19.1 | 1.7 | 0.7 – 4.4 | 3.2 | 1.4 – 7.6 |
| 3-5 | 13.6 | 8 – 22.9 | 1.2 | 0.8 – 1.7 | 2.9 | 1.7 – 5.1 |
