# Supplementary material for: Are we doing too many non-therapeutic laparotomies in trauma? An analysis of the National Trauma Data Bank
Source: Springer Nature journal article supplement (doi:10.1007/s00464-019-07169-z), 2019-10-11
Supplement: MOESM2 [file 17264652]

Supplement 2. Multivariate analysis for independent predictors of outcomes in penetrating injuries

*(Head injury omitted due to collinearity)

|  | **Mortality** | | **Prolonged Stay** | | **Complications** | |
| --- | --- | --- | --- | --- | --- | --- |
| **Variable** | **OR** | **95% CI** | **OR** | **95% CI** | **OR** | **95% CI** |
| NL (vs.DL) | 7.1 | 1.7 – 29.5 | 3 | 2.3 – 4.2 | 2.2 | 1.3 – 3.9 |
| Age (vs.18-34) |  |  |  |  |  |  |
| 35-64 | 1.6 | 0.9 – 3 | 1.4 | 1.2 – 1.7 | 1.5 | 0.97 – 2.3 |
| 65+ | 5.5 | 1.3 – 22.8 | 4.2 | 1.6 – 6.6 | 3.8 | 1.5 – 9.9 |
| Race (vs. White) |  |  |  |  |  |  |
| Black | 3 | 1.1 – 8 | 1.1 | 0.9 – 1.4 | 1.3 | 0.8 – 2.2 |
| Hispanic | 1.6 | 0.5 – 5 | 0.8 | 0.5 – 1.2 | 0.4 | 0.4 – 1.6 |
| Other | 0.98 | 0.3 – 3.5 | 0.5 | 0.3 – 0.9 | 0.3 | 0.3 – 2.1 |
| ISS | 1.1 | 0.99 – 1.2 | 1.18 | 1.14 – 1.2 | 1.2 | 1.13 – 1.27 |
| Severe Chest Injury | 1.3 | 0.5 – 3.3 | 1.4 | 1.1 – 1.8 | 1 | 0.65 – 1.6 |
| GCS (vs. 12-15) |  |  |  |  |  |  |
| 9-11 | 4.6 | 0.99 – 21.4 | 3.5 | 1.5 – 8.3 | 2.8 | 0.9 – 9 |
| 6-8 | 9.2 | 2 – 42.3 | 3.4 | 1.2 – 9.7 | 2.2 | 0.5 – 9.8 |
| 3-5 | 13.6 | 4.7 – 39.1 | 1.5 | 0.99 – 2.1 | 3.2 | 1.4 – 7.1 |
